# Supplementary material
Source: PubMed Central journal article supplement (PMC2413015)
Supplement: NIHMS51643-supplement-06.pdf [file NIHMS51643-supplement-06.pdf]

**Suppl. Table 1. Expression levels of main TGF- $\beta$  components in 786-0 cells**

|                | <b>Location in Fig. 1</b> | <b>Function</b>                              | <b>Expression level</b> |
|----------------|---------------------------|----------------------------------------------|-------------------------|
| TGF- $\beta$ 1 | f25                       | cytokine                                     | very low                |
| TGF- $\beta$ 2 | h25                       | cytokine                                     | barely detectable       |
| TGF- $\beta$ 3 | a26                       | cytokine                                     | not expressed           |
| ACVR2          | c15                       | Activin A receptor,<br>type II               | Average                 |
| ALK-1          | e15                       | activin A receptor,<br>type II-like          | not expressed           |
| Smad1          | g22                       | transcriptional factor                       | Average                 |
| Smad5          | c23                       | transcriptional factor                       | Average                 |
| ALK-5          | c26                       | TGF $\beta$ receptor, type<br>I              | Low                     |
| Smad2          | h22                       | transcriptional factor                       | High                    |
| Smad3          | a23                       | transcriptional factor                       | not expressed           |
| Endoglin       | a19                       | component of TGF $\beta$<br>receptor complex | not expressed           |
| Smad4          | b23                       | transcriptional factor                       | very high               |
| Smad6          | d23                       | transcriptional factor                       | not expressed           |
| Smad7          | e23                       | transcriptional factor                       | not expressed           |
| Smad9          | f23                       | transcriptional factor                       | not expressed           |
