# Supplementary material
Source: PubMed Central journal article supplement (PMC2413015)
Supplement: NIHMS51643-supplement-07.pdf [file NIHMS51643-supplement-07.pdf]

**Suppl. Table 2. OncoPrint analysis of TGFBI expression in tumors**

| <b>Study</b>                 | <b>Tumor or tissue type/control</b>                        | <b>Expression status</b> | <b>P value</b> |
|------------------------------|------------------------------------------------------------|--------------------------|----------------|
| Notterman_Colon              | Colon Adenocarcinoma/Normal colon                          | Up-regulated             | 1.2E-5         |
| Lenburg_Renal                | Clear Renal Cell Carcinoma/Normal Kidney                   | Up-regulated             | 5.2E-4         |
| Longston_Pancreas            | Pancreatic Adenocarcinoma/Normal Pancreas and Pancreatitis | Up-regulated             | 1.7E-4         |
| Lacobuzio-Donahue_Pancreas_2 | Pancreatic Adenocarcinoma/Normal Pancreas                  | Up-regulated             | 8.7E-4         |
| Shai_Brain                   | Glioblastoma/Normal Brain                                  | Up-regulated             | 1.5E-4         |
| Cromer Head-Neck             | Head and Neck Squamous Cell Carcinoma/Normal Uvula         | Up-regulated             | 3.6E-4         |
| Korkola_Seminoma             | Adult Male Germ Cell Tumor/Normal Testis                   | Up-regulated             | 6.2E-32        |
